# Supplementary material for: A Human(e) Factor in Clinical Decision Support Systems
Source: PubMed Central journal article supplement (PMC6444220; doi:10.2196/11732), 2019-03-19
Supplement: jmir_v21i3e11732_app1.pdf [file jmir_v21i3e11732_app1.pdf]

## Supplemental Material

**Supplemental table 1** *This table shows a number of indicative characteristics of the Utrecht Patient Oriented Database (UPOD) as of February 2018.*

| UPOD Database Entity                                          | Total       |
|---------------------------------------------------------------|-------------|
| Patients (unique)                                             | 2.300.000   |
| Clinical Patients (unique)                                    | 600.000     |
| Hospitalizations                                              | 1.500.000   |
| Lab orders                                                    | 12.000.000  |
| Lab tests                                                     | 110.000.000 |
| Medication orders (clinical)                                  | 6.000.000   |
| Medication orders (policlinical)                              | 4.500.000   |
| Blood Cell Counts                                             | 2.400.000   |
| Measurements                                                  | 75.000.000  |
| Procedures treatments                                         | 97.000.000  |
| Diagnose Treatment Combinations<br>(DBC, in Dutch healthcare) | 3.500.000   |
